# Supplementary material for: Effectiveness of E-Beam Radiation against Saccharomyces cerevisiae, Brettanomyces bruxellensis, and Wild Yeast and Their Influence on Wine Quality
Source: MDPI journal article supplement (doi:10.3390/molecules28124867), 2023-06-20
Supplement: s1 [file s1]

Tabela 1S. The content of polyphenols [ug/mL]

| Compounds                                | <i>B. bruxellensis</i> |              |              |              |              | <i>S. bayanus</i> |              |              |              |               | <i>S. cerevisiae</i> 1 (ES 181) |              |              |              |              | <i>S. cerevisiae</i> 2 (ES 123) |              |              |              |              | Wild Yeasts  |              |              |              |              |
|------------------------------------------|------------------------|--------------|--------------|--------------|--------------|-------------------|--------------|--------------|--------------|---------------|---------------------------------|--------------|--------------|--------------|--------------|---------------------------------|--------------|--------------|--------------|--------------|--------------|--------------|--------------|--------------|--------------|
|                                          | Control                | 2.5          | 5            | 7.5          | Mean         | Control           | 2.5          | 5            | 7.5          | Mean          | Control                         | 2.5          | 5            | 7.5          | Mean         | Control                         | 2.5          | 5            | 7.5          | Mean         | Control      | 2.5          | 5            | 7.5          | Mean         |
| Cyanidin 3,5- <i>O</i> -diglucoside      | 17.67                  | 16.88        | 14.94        | 11.22        | <b>15.18</b> | 7.6               | 7.41         | 6.04         | 4.98         | <b>6.51</b>   | 14.9                            | 13.91        | 12.72        | 8.44         | <b>12.49</b> | 12.26                           | 10.5         | 9.07         | 8.47         | <b>10.08</b> | 17.21        | 16.34        | 12.93        | 9.45         | <b>13.98</b> |
| Delphinidin 3- <i>O</i> -glucoside       | 9.61                   | 9.58         | 8.38         | 5.25         | <b>8.21</b>  | 5.48              | 5.52         | 4.83         | 2.59         | <b>4.61</b>   | 6.66                            | 6.02         | 4.81         | 2.56         | <b>5.01</b>  | 7.32                            | 7.24         | 6.02         | 5.18         | <b>6.44</b>  | 11.96        | 11.83        | 10.91        | 7.06         | <b>10.44</b> |
| Delphinidin 3,5-diglucoside              | 7.94                   | 6.65         | 6.12         | 3.69         | <b>6.10</b>  | 3.73              | 3.11         | 2.86         | 2.20         | <b>2.98</b>   | 8.90                            | 8.64         | 6.53         | 4.89         | <b>7.24</b>  | 5.66                            | 5.05         | 5.24         | 3.24         | <b>4.80</b>  | 5.00         | 4.64         | 4.00         | 3.77         | <b>4.35</b>  |
| Malvidin 3,5- <i>O</i> -diglucoside      | 26.47                  | 25.42        | 19.77        | 16.24        | <b>21.98</b> | 9.79              | 8.96         | 7.86         | 6.03         | <b>8.16</b>   | 8.40                            | 6.89         | 6.16         | 4.36         | <b>6.45</b>  | 9.49                            | 6.70         | 6.02         | 5.52         | <b>6.93</b>  | 15.98        | 15.77        | 14.07        | 9.32         | <b>13.79</b> |
| Malvidin 3- <i>O</i> -glucoside          | 17.52                  | 17.01        | 16.21        | 11.5         | <b>15.56</b> | 8.24              | 8.02         | 7.86         | 4.47         | <b>7.15</b>   | 14.29                           | 12.91        | 11.85        | 7.94         | <b>11.75</b> | 12.49                           | 11.99        | 10.88        | 9.19         | <b>11.14</b> | 16.09        | 13.58        | 12.88        | 6.65         | <b>12.30</b> |
| Peonidin 3- <i>O</i> -glucoside          | 3.95                   | 3.17         | 2.79         | 1.25         | <b>2.79</b>  | 1.85              | 1.70         | 1.27         | 1.39         | <b>1.55</b>   | 6.59                            | 4.19         | 3.56         | 4.92         | <b>4.82</b>  | 2.81                            | 2.73         | 1.97         | 1.73         | <b>2.31</b>  | 4.91         | 4.40         | 2.75         | 2.95         | <b>3.75</b>  |
| Petunidin 3- <i>O</i> -glucoside         | 8.62                   | 7.84         | 7.00         | 5.02         | <b>7.12</b>  | 3.62              | 2.97         | 2.35         | 1.03         | <b>2.49</b>   | 4.43                            | 4.16         | 3.27         | 2.41         | <b>3.57</b>  | 5.94                            | 5.43         | 4.97         | 3.32         | <b>4.92</b>  | 6.82         | 6.78         | 7.02         | 6.19         | <b>6.70</b>  |
| <b>Anthocyanins total</b>                | <b>91.78</b>           | <b>86.55</b> | <b>75.21</b> | <b>54.17</b> | <b>76.92</b> | <b>40.31</b>      | <b>37.69</b> | <b>33.07</b> | <b>22.69</b> | <b>33.44</b>  | <b>64.17</b>                    | <b>56.72</b> | <b>48.9</b>  | <b>35.52</b> | <b>51.32</b> | <b>55.97</b>                    | <b>49.64</b> | <b>44.17</b> | <b>36.65</b> | <b>46.60</b> | <b>77.97</b> | <b>73.34</b> | <b>64.56</b> | <b>45.39</b> | <b>65.31</b> |
| Gallic acid                              | 0.01                   | 0.12         | 0.19         | 0.05         | <b>0.09</b>  | 0.05              | 0.05         | 0.09         | 0.06         | <b>0.06</b>   | 0.04                            | 0.29         | 0.54         | 0.62         | <b>0.37</b>  | 0.2                             | 0.44         | 0.03         | 0.14         | <b>0.20</b>  | 0.05         | 0.03         | 0.03         | 0.02         | <b>0.03</b>  |
| Protocatechuic acid                      | 1.39                   | 1.29         | 1.09         | 0.75         | <b>1.13</b>  | 1.51              | 1.29         | 1.17         | 0.67         | <b>1.16</b>   | 1.77                            | 1.55         | 1.41         | 1.16         | <b>1.47</b>  | 1.39                            | 1.20         | 1.12         | 1.25         | <b>1.24</b>  | 0.99         | 1.20         | 1.51         | 0.75         | <b>1.11</b>  |
| Caftaric acid                            | 10.69                  | 8.33         | 3.60         | 3.13         | <b>6.44</b>  | 8.79              | 6.57         | 4.43         | 5.49         | <b>6.32</b>   | 9.05                            | 7.80         | 4.45         | 4.33         | <b>6.41</b>  | 7.34                            | 4.51         | 4.76         | 5.38         | <b>5.50</b>  | 2.77         | 5.03         | 8.93         | 3.42         | <b>5.04</b>  |
| Coutaric acid                            | 9.72                   | 7.92         | 3.90         | 3.88         | <b>6.36</b>  | 8.93              | 6.50         | 4.38         | 6.49         | <b>6.58</b>   | 9.49                            | 6.65         | 4.06         | 4.11         | <b>6.08</b>  | 7.20                            | 4.27         | 5.06         | 5.36         | <b>5.47</b>  | 2.34         | 6.98         | 8.82         | 3.69         | <b>5.46</b>  |
| Caffeic acid                             | 0.13                   | 0.15         | 0.09         | 0.08         | <b>0.11</b>  | 0.15              | 0.13         | 0.11         | 0.09         | <b>0.12</b>   | 0.08                            | 0.08         | 0.08         | 0.05         | <b>0.07</b>  | 0.06                            | 0.05         | 0.11         | 0.04         | <b>0.07</b>  | 0.10         | 0.11         | 0.06         | 0.05         | <b>0.08</b>  |
| <i>p</i> -Coumaric acid                  | 0.26                   | 0.24         | 0.15         | 0.18         | <b>0.21</b>  | 0.16              | 0.09         | 0.05         | 0.07         | <b>0.09</b>   | 0.10                            | 0.06         | 0.04         | 0.04         | <b>0.06</b>  | 0.06                            | 0.03         | 0.09         | 0.04         | <b>0.06</b>  | 0.03         | 0.10         | 0.06         | 0.04         | <b>0.06</b>  |
| Coumaric acid                            | 0.22                   | 0.16         | 0.11         | 0.13         | <b>0.16</b>  | 0.18              | 0.14         | 0.10         | 0.10         | <b>0.13</b>   | 0.13                            | 0.09         | 0.06         | 0.06         | <b>0.09</b>  | 0.11                            | 0.07         | 0.12         | 0.03         | <b>0.08</b>  | 0.05         | 0.15         | 0.14         | 0.17         | <b>0.13</b>  |
| Ferulic acid                             | 0.01                   | 0.01         | 0.01         | 0.01         | <b>0.01</b>  | 0.01              | 0.00         | 0.01         | 0.00         | <b>0.01</b>   | 0.00                            | 0.01         | 0.00         | 0.00         | <b>0.00</b>  | 0.01                            | 0.00         | 0.00         | 0.00         | <b>0.00</b>  | 0.00         | 0.00         | 0.01         | 0.00         | <b>0.00</b>  |
| <b>Phenolic acids total</b>              | <b>22.43</b>           | <b>18.22</b> | <b>9.14</b>  | <b>8.21</b>  | <b>14.5</b>  | <b>19.78</b>      | <b>14.77</b> | <b>10.34</b> | <b>12.97</b> | <b>14.465</b> | <b>20.66</b>                    | <b>16.53</b> | <b>10.64</b> | <b>10.37</b> | <b>14.55</b> | <b>16.37</b>                    | <b>10.57</b> | <b>11.29</b> | <b>12.24</b> | <b>12.61</b> | <b>6.33</b>  | <b>13.6</b>  | <b>19.56</b> | <b>8.14</b>  | <b>11.90</b> |
| Myricetin-3- <i>O</i> -glucoside         | 0.10                   | 0.27         | 0.10         | 0.15         | <b>0.16</b>  | 0.22              | 0.13         | 0.2          | 0.24         | <b>0.20</b>   | 0.12                            | 0.27         | 0.29         | 0.19         | <b>0.22</b>  | 0.11                            | 0.1          | 0.19         | 0.08         | <b>0.12</b>  | 0.08         | 0.1          | 0.08         | 0.07         | <b>0.08</b>  |
| Myricetin-3- <i>O</i> -rutinoside        | 0.01                   | 0.02         | 0.02         | 0.03         | <b>0.02</b>  | 0.02              | 0.01         | 0.02         | 0.01         | <b>0.02</b>   | 0.02                            | 0.02         | 0.02         | 0.01         | <b>0.02</b>  | 0.01                            | 0.01         | 0.03         | 0.01         | <b>0.02</b>  | 0.01         | 0.01         | 0.01         | 0.01         | <b>0.01</b>  |
| Quercetin 3- <i>O</i> -rutinoside        | 0.00                   | 0.00         | 0.00         | 0.00         | <b>0.00</b>  | 0.00              | 0.00         | 0.00         | 0.00         | <b>0.00</b>   | 0.00                            | 0.01         | 0.01         | 0.00         | <b>0.01</b>  | 0.01                            | 0.01         | 0.00         | 0.00         | <b>0.01</b>  | 0.01         | 0.01         | 0.01         | 0.01         | <b>0.01</b>  |
| Isorhamnetin-3- <i>O</i> -glucoside      | 0.21                   | 0.3          | 0.18         | 0.16         | <b>0.21</b>  | 0.24              | 0.21         | 0.27         | 0.26         | <b>0.25</b>   | 0.2                             | 0.33         | 0.35         | 0.28         | <b>0.29</b>  | 0.14                            | 0.14         | 0.3          | 0.17         | <b>0.19</b>  | 0.13         | 0.15         | 0.12         | 0.12         | <b>0.13</b>  |
| Quercetin 3- <i>O</i> -glucoside         | 0.02                   | 0.03         | 0.02         | 0.03         | <b>0.03</b>  | 0.02              | 0.02         | 0.02         | 0.01         | <b>0.02</b>   | 0.02                            | 0.03         | 0.03         | 0.02         | <b>0.03</b>  | 0.01                            | 0.01         | 0.03         | 0.01         | <b>0.02</b>  | 0.01         | 0.01         | 0.01         | 0.01         | <b>0.01</b>  |
| Dihydroquercetin 3- <i>O</i> -rhamnoside | 0.00                   | 0.00         | 0.00         | 0.00         | <b>0.00</b>  | 0.00              | 0.00         | 0.00         | 0.00         | <b>0.00</b>   | 0.00                            | 0.00         | 0.00         | 0.00         | <b>0.00</b>  | 0.01                            | 0.01         | 0.00         | 0.00         | <b>0.01</b>  | 0.01         | 0.01         | 0.01         | 0.01         | <b>0.01</b>  |
| <b>Flavonols total</b>                   | <b>0.34</b>            | <b>0.62</b>  | <b>0.32</b>  | <b>0.37</b>  | <b>0.41</b>  | <b>0.5</b>        | <b>0.37</b>  | <b>0.51</b>  | <b>0.52</b>  | <b>0.47</b>   | <b>0.36</b>                     | <b>0.66</b>  | <b>0.7</b>   | <b>0.5</b>   | <b>0.55</b>  | <b>0.29</b>                     | <b>0.28</b>  | <b>0.55</b>  | <b>0.27</b>  | <b>0.34</b>  | <b>0.25</b>  | <b>0.29</b>  | <b>0.24</b>  | <b>0.23</b>  | <b>0.25</b>  |
| Procyanidin type B                       | 2.84                   | 2.93         | 2.98         | 3.08         | <b>2.96</b>  | 2.84              | 3.00         | 3.02         | 2.55         | <b>2.85</b>   | 3.37                            | 3.35         | 3.34         | 2.05         | <b>3.03</b>  | 2.84                            | 2.98         | 2.68         | 2.79         | <b>2.82</b>  | 2.84         | 3.00         | 2.93         | 1.78         | <b>2.64</b>  |
| Procyanidin type B                       | 3.06                   | 2.98         | 2.50         | 2.74         | <b>2.82</b>  | 3.66              | 3.53         | 3.48         | 2.42         | <b>3.27</b>   | 3.56                            | 3.29         | 3.06         | 2.02         | <b>2.98</b>  | 3.06                            | 2.50         | 3.89         | 2.92         | <b>3.09</b>  | 3.66         | 3.53         | 2.98         | 2.07         | <b>3.06</b>  |
| (+) catechin                             | 2.65                   | 2.33         | 1.63         | 2.50         | <b>2.28</b>  | 0.29              | 0.21         | 0.20         | 0.19         | <b>0.22</b>   | 0.45                            | 0.61         | 0.75         | 0.37         | <b>0.55</b>  | 0.34                            | 0.62         | 0.24         | 0.41         | <b>0.40</b>  | 0.34         | 0.10         | 0.60         | 0.21         | <b>0.31</b>  |

|                           |               |               |               |              |               |              |              |              |              |              |               |               |              |              |              |               |              |              |              |              |               |               |               |              |               |
|---------------------------|---------------|---------------|---------------|--------------|---------------|--------------|--------------|--------------|--------------|--------------|---------------|---------------|--------------|--------------|--------------|---------------|--------------|--------------|--------------|--------------|---------------|---------------|---------------|--------------|---------------|
| Procyanidin type A        | 4.32          | 4.08          | 4.18          | 4.85         | <b>4.36</b>   | 3.45         | 3.87         | 3.89         | 2.54         | <b>3.44</b>  | 4.45          | 3.84          | 3.8          | 4.46         | <b>4.14</b>  | 4.32          | 4.18         | 4.02         | 3.55         | <b>4.02</b>  | 3.45          | 3.87          | 4.08          | 2.32         | <b>3.43</b>   |
| Procyanidin type A        | 1.07          | 0.93          | 0.57          | 0.88         | <b>0.86</b>   | 0.94         | 0.85         | 0.75         | 0.68         | <b>0.81</b>  | 0.74          | 0.70          | 0.65         | 0.42         | <b>0.63</b>  | 1.07          | 0.57         | 1.06         | 0.95         | <b>0.91</b>  | 0.94          | 0.85          | 0.93          | 0.55         | <b>0.82</b>   |
| (-) epicatechin           | 0.95          | 0.93          | 0.65          | 0.57         | <b>0.78</b>   | 0.61         | 0.27         | 0.21         | 0.25         | <b>0.34</b>  | 0.51          | 0.14          | 0.12         | 0.09         | <b>0.22</b>  | 0.11          | 0.06         | 0.07         | 0.05         | <b>0.07</b>  | 0.12          | 0.27          | 0.08          | 0.10         | <b>0.14</b>   |
| Epicatechin gallate       | 14.13         | 12.59         | 11.91         | 11.76        | <b>12.60</b>  | 13.1         | 12.51        | 12.55        | 13.65        | <b>12.95</b> | 13.27         | 13.13         | 13.12        | 8.04         | <b>11.89</b> | 13.55         | 13.45        | 12.22        | 11.97        | <b>12.80</b> | 12.07         | 13.00         | 13.88         | 7.92         | <b>11.72</b>  |
| <b>Flavan-3-ols total</b> | <b>29.02</b>  | <b>26.77</b>  | <b>24.42</b>  | <b>26.38</b> | <b>26.64</b>  | <b>24.89</b> | <b>24.24</b> | <b>24.1</b>  | <b>22.28</b> | <b>23.87</b> | <b>26.35</b>  | <b>25.06</b>  | <b>24.84</b> | <b>17.45</b> | <b>23.42</b> | <b>25.29</b>  | <b>24.36</b> | <b>24.18</b> | <b>22.64</b> | <b>24.11</b> | <b>23.42</b>  | <b>24.62</b>  | <b>25.48</b>  | <b>14.95</b> | <b>22.11</b>  |
| Trans-resveratrol         | 0.45          | 0.43          | 0.41          | 0.49         | <b>0.45</b>   | 0.46         | 0.38         | 0.44         | 0.35         | <b>0.41</b>  | 0.34          | 0.45          | 0.51         | 0.56         | <b>0.47</b>  | 0.67          | 0.58         | 0.37         | 0.43         | <b>0.51</b>  | 0.62          | 0.56          | 0.68          | 0.38         | <b>0.56</b>   |
| Cis-resveratrol           | 0.02          | 0.01          | 0.01          | 0.01         | <b>0.01</b>   | 0.04         | 0.01         | 0.04         | 0.03         | <b>0.03</b>  | 0.01          | 0.03          | 0.01         | 0.01         | <b>0.02</b>  | 0.13          | 0.09         | 0.05         | 0.04         | <b>0.08</b>  | 0.05          | 0.02          | 0.13          | 0.04         | <b>0.06</b>   |
| Trans-piceid              | 1.46          | 1.16          | 1.03          | 0.83         | <b>1.12</b>   | 1.25         | 0.71         | 1.21         | 0.92         | <b>1.02</b>  | 0.49          | 1.67          | 1.51         | 1.75         | <b>1.36</b>  | 1.94          | 1.41         | 0.47         | 0.48         | <b>1.08</b>  | 1.78          | 1.45          | 1.84          | 1.53         | <b>1.65</b>   |
| Cis-piceid                | 0.26          | 0.23          | 0.34          | 0.39         | <b>0.31</b>   | 0.23         | 0.30         | 0.21         | 0.27         | <b>0.25</b>  | 0.30          | 0.24          | 0.28         | 0.17         | <b>0.25</b>  | 0.44          | 0.33         | 0.27         | 0.21         | <b>0.31</b>  | 0.27          | 0.28          | 0.3           | 0.17         | <b>0.26</b>   |
| <b>Stilbenes total</b>    | <b>2.19</b>   | <b>1.83</b>   | <b>1.79</b>   | <b>1.72</b>  | <b>1.88</b>   | <b>1.98</b>  | <b>1.40</b>  | <b>1.90</b>  | <b>1.57</b>  | <b>1.71</b>  | <b>1.14</b>   | <b>2.39</b>   | <b>2.31</b>  | <b>2.49</b>  | <b>2.08</b>  | <b>3.18</b>   | <b>2.41</b>  | <b>1.16</b>  | <b>1.16</b>  | <b>1.97</b>  | <b>2.72</b>   | <b>2.31</b>   | <b>2.95</b>   | <b>2.12</b>  | <b>2.52</b>   |
| <b>TOTAL</b>              | <b>145.80</b> | <b>134.00</b> | <b>110.90</b> | <b>90.90</b> | <b>120.40</b> | <b>87.50</b> | <b>78.50</b> | <b>69.90</b> | <b>60.00</b> | <b>74.00</b> | <b>112.70</b> | <b>101.40</b> | <b>87.40</b> | <b>66.30</b> | <b>91.90</b> | <b>101.10</b> | <b>87.30</b> | <b>81.40</b> | <b>73.00</b> | <b>85.70</b> | <b>110.70</b> | <b>114.20</b> | <b>112.80</b> | <b>70.80</b> | <b>102.10</b> |
